# Supplementary material for: Stepwise copolymerization of polybenzimidazole for a low dielectric constant and ultrahigh heat resistance
Source: Royal Society of Chemistry journal article supplement (doi:10.1039/d2ra01488b), 2022-01-01
Supplement: d2ra01488b1.pdf [file d2ra01488b1.pdf]

## Supplementary Information

### Stepwise copolymerization of polybenzimidazole for a low dielectric constant and ultrahigh heat resistance

*Xianzhu Zhong<sup>1</sup>, Aniruddha Nag<sup>1,3</sup>, Jiabei Zhou<sup>1</sup>, Kenji Takada<sup>1</sup>, Fitri Adila Amat  
Yusof,<sup>2</sup> Tetsu Mitsumata<sup>2</sup>, Kenji Oqmhula<sup>1</sup>, Kenta Hongo<sup>1</sup>, Ryo Maezono<sup>1</sup>,  
Tatsuo Kaneko<sup>1\*</sup>*

- 1) Graduate School of Advanced Science and Technology, Energy and Environment Area, Japan Advanced Institute of Science and Technology (JAIST), 1-1 Asahidai, Nomi, Ishikawa, 923-1292, Japan
- 2) Department of Materials Science & Technology, Faculty of Engineering, Niigata University, Ikarashi, Nishi-ku, Niigata, 950-2181, Japan
- 3) School of Energy Science and Engineering, Vidyasirimedhi Institute of Science and Technology, Rayong 21210, Thailand

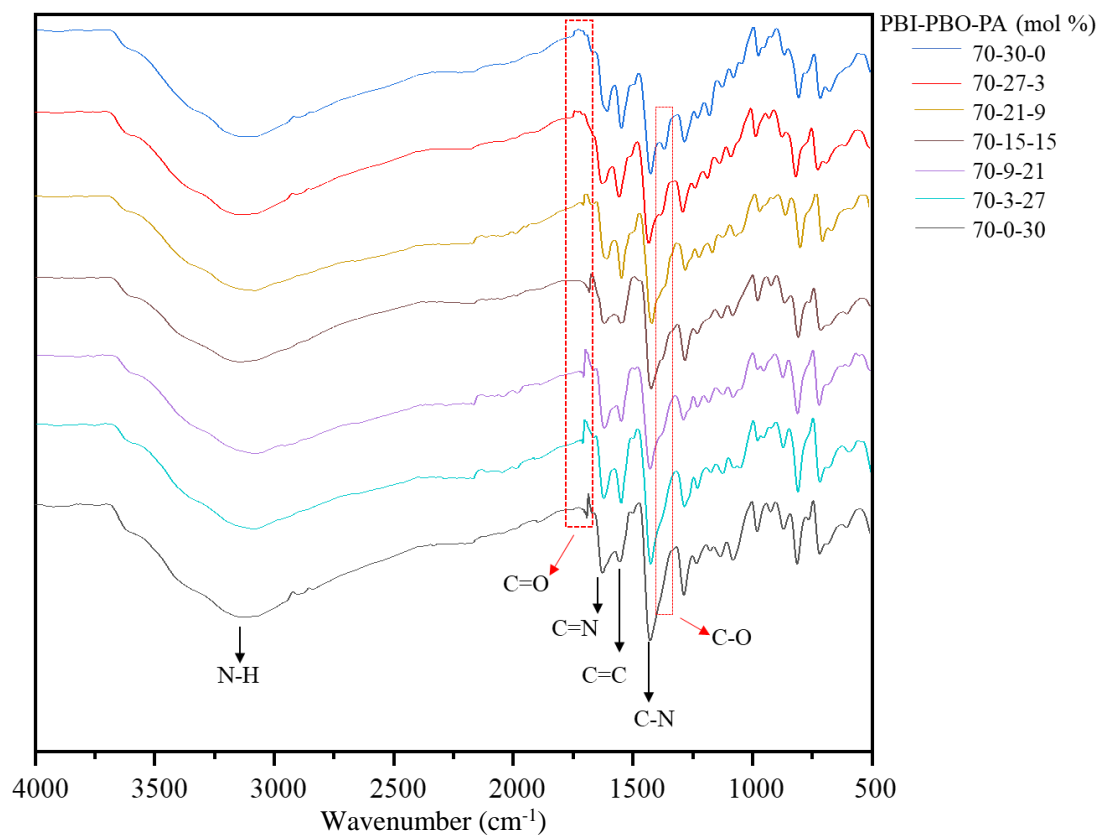

**Figure S1.** FT-IR spectra of terpolymer in varies molar compositions.

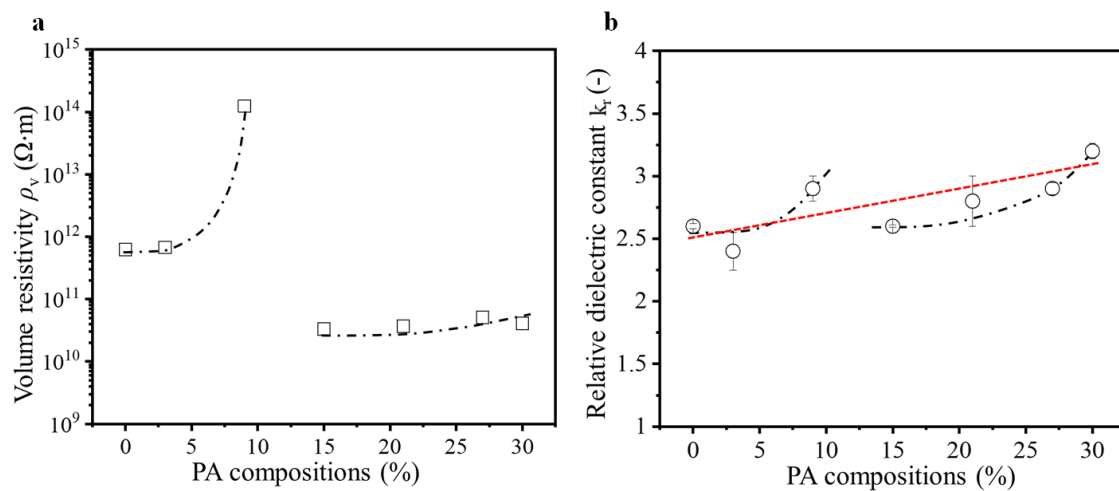

**Figure S2** Dielectric properties of terpolymers. **a** Volume resistivity and **b** relative dielectric constant at 1 MHz for dried P(BI-*b*-BO-A) films of different PA compositions. The broken lines were drawn by naked eyes and the dotted line in **b** was drawn by eq. (2)

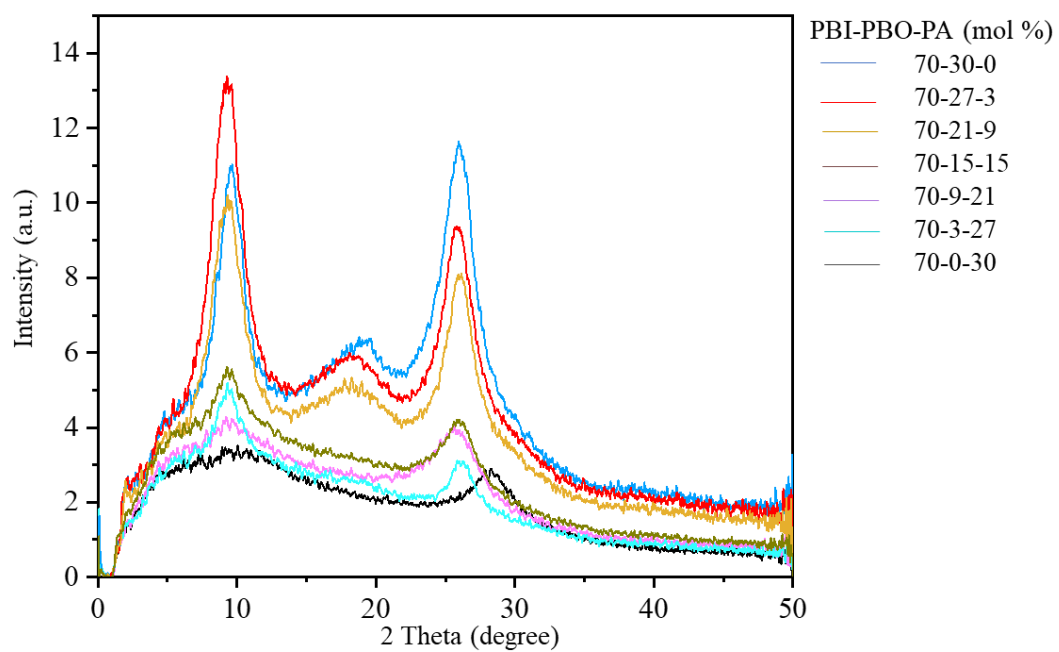

**Figure S3.** X-ray diffraction curves on terpolymer of varies of molar compositions.

**Table S1.** The degree of crystallinity of terpolymers.

| PBI-PBO-PA (mol %) | Degree of crystallinity (%) |
|--------------------|-----------------------------|
| 70-30-0            | 23                          |
| 70-27-3            | 24                          |
| 70-21-9            | 21                          |
| 70-15-15           | 9                           |
| 70-9-21            | 7                           |
| 70-3-27            | 8                           |
| 70-0-30            | 5                           |

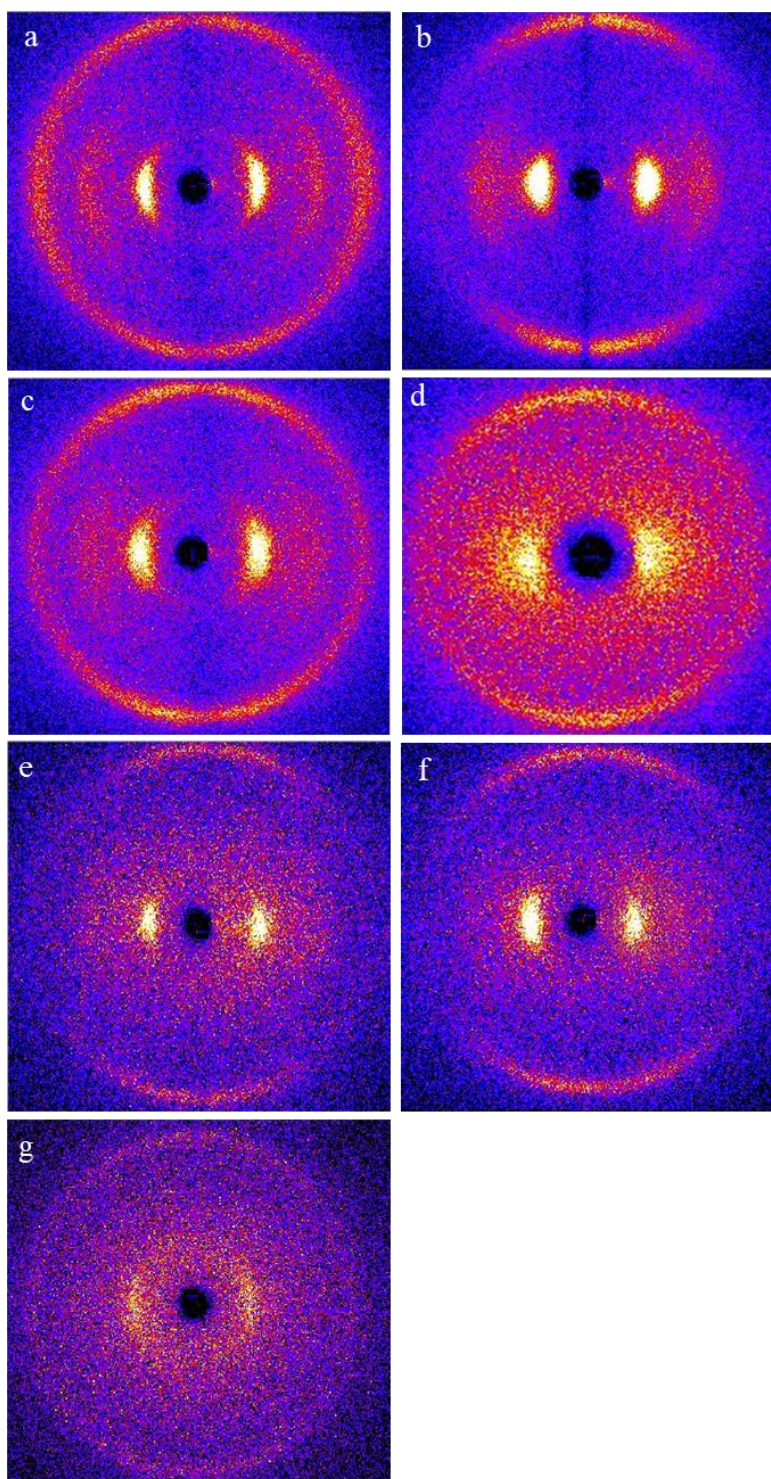

**Figure S4.** X-ray diffraction patterns of terpolymers synthesized by stepwise polymerization under various molar compositions of PBI-PBO-PA (mol %): a 70-30-0; b 70-27-3; c 70-21-9; d 70-15-15; e 70-9-21; f 70-3-27; g 70-0-30.

**Calculation of crystallinity from XRD analysis:**

According to the XRD curves, it is obviously that there is a sudden change in the crystallinity when PA ratio exceeds 9% (**Figure S4**), the degree of crystallinity is listed in **Table S1**, indicating the structural change occurred from the ratio 70-15-15, this can also be observed directly from XRD pattern as is showed in **Figure S4**.
